# Supplementary figures and images for: PDMS free-flow electrophoresis chips with integrated partitioning bars for bubble segregation
Source: Royal Society of Chemistry journal article supplement (doi:10.1039/c0lc00347f), 2010-11-08

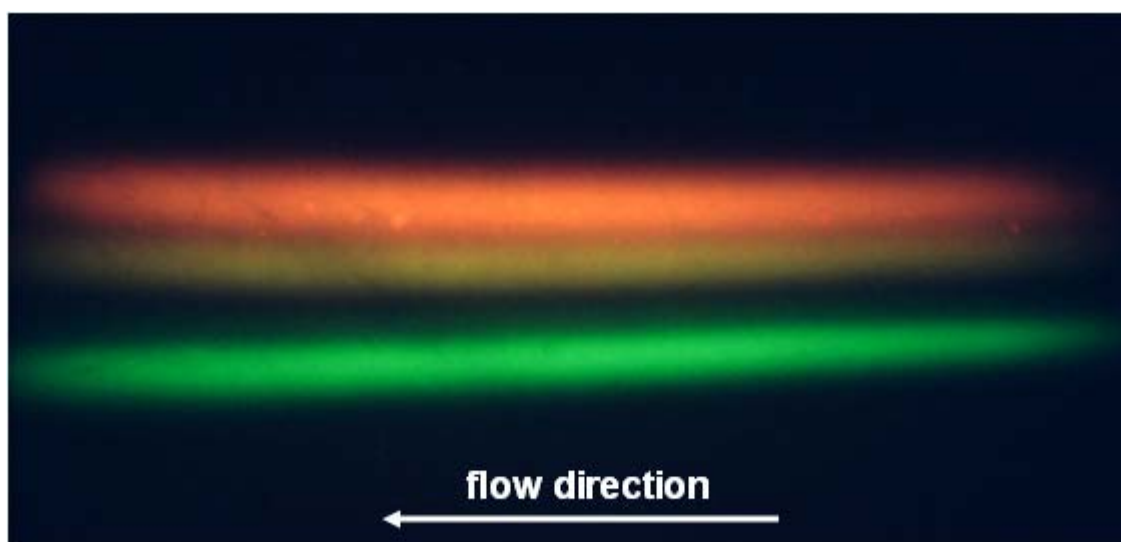

Supplement: c0lc00347f.pdf [file c0lc00347f.pdf]
